# Supplementary material for: Screening diagnostic markers of osteoporosis based on ferroptosis of osteoblast and osteoclast
Source: publisher site journal article supplement (doi:10.18632/aging.204945), 2023-09-28
Supplement: Supplementary file [file aging-v15i18-204945-supplementary-material-SD1.pdf]

## SUPPLEMENTARY FIGURES

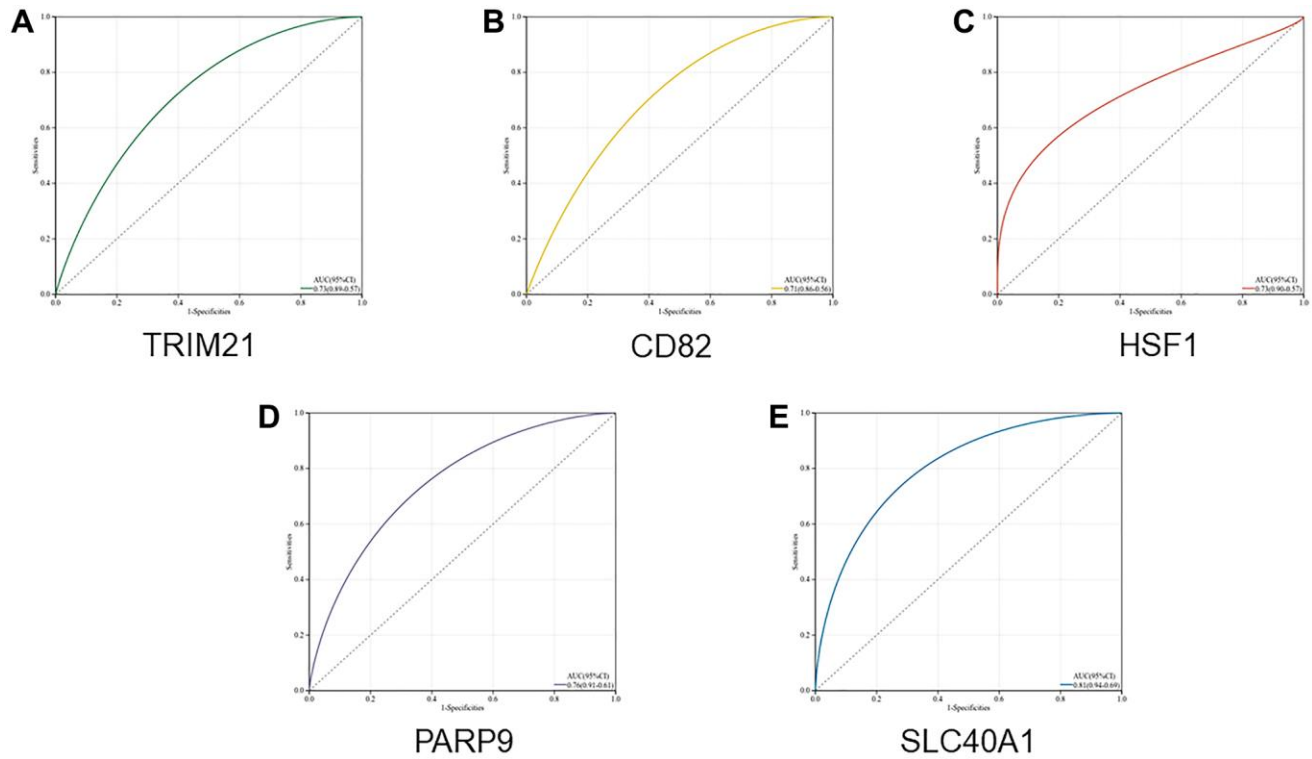

**Supplementary Figure 1. Analyze the validity of diagnostic markers through ROC curve. (A) ROC curve of TRIM21. (B) ROC curve of CD82. (C) ROC curve of HSF1. (D) ROC curve of PARP9. (E) ROC curve of SLC40A1.**

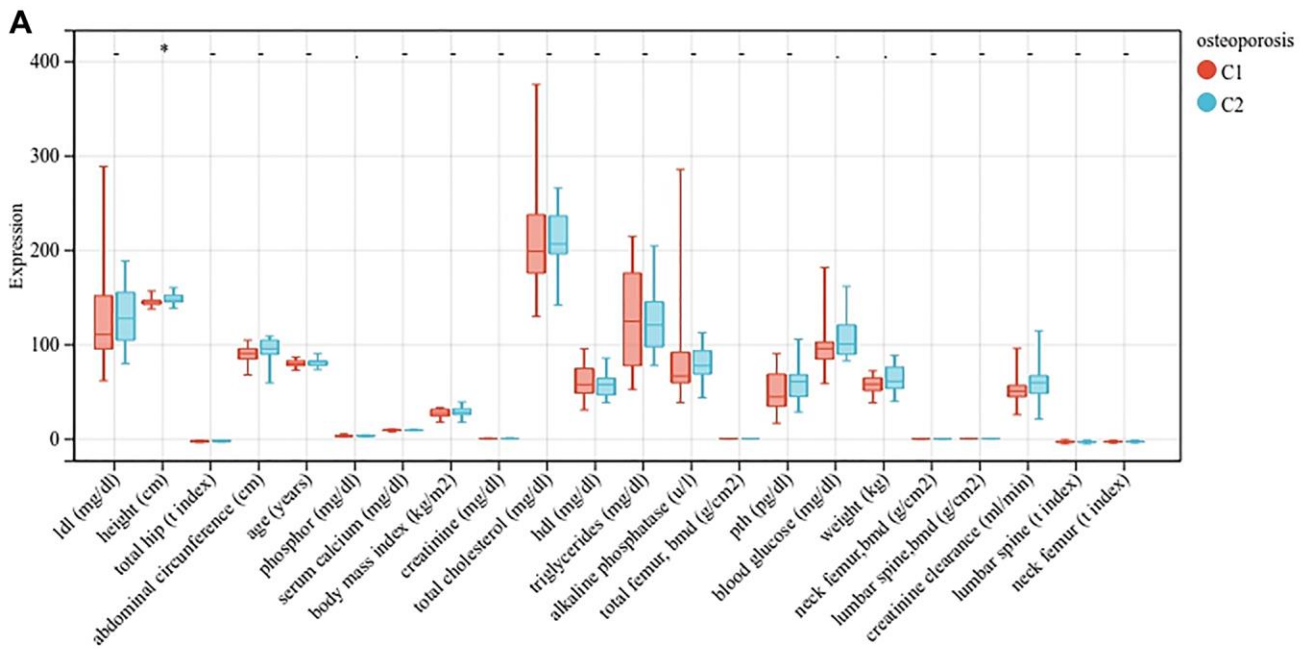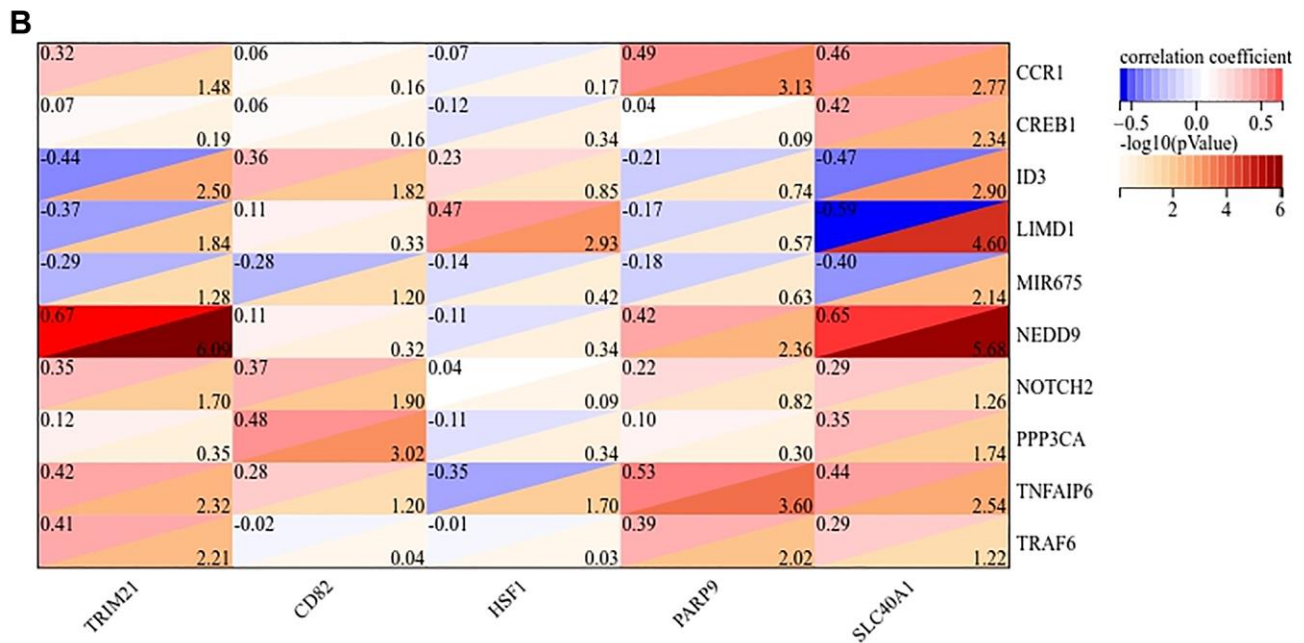

**Supplementary Figure 2.** (A) Comparison of clinical characteristics of two subtypes. (B) Correlation heatmap of ferroptosis genes and osteogenesis and osteoclast genes. (\* means  $p < 0.1$ , statistically significant difference was  $*p < 0.05$ ).
