# Supplementary material for: Screening diagnostic markers of osteoporosis based on ferroptosis of osteoblast and osteoclast
Source: publisher site journal article supplement (doi:10.18632/aging.204945), 2023-09-28
Supplement: Supplementary file [file aging-v15i18-204945-supplementary-material-SD2.pdf]

## SUPPLEMENTARY TABLES

**Supplementary Table 1. Primers of mice genes for qPCR.**

| Genes | F Sequences (5'—3')      | R Sequences (5'—3')     |
|-------|--------------------------|-------------------------|
| GAPDH | ACCCAGAAGACTGTGGATGG     | CACATTGGGGGTAGGAACAC    |
| TRAP  | CTGGAGTGCACGATGCCAGCGACA | TCCGTGCTCGGCGATGGACCAGA |
| CTSK  | AGCAGAACGGAGGCATTGACTC   | TTTAGCTGCCTTTGCCGTGGC   |
| ALP   | TGTTACTGCCAGGACCCATA     | CTTCCTTGATGGTCTCCACA    |
| RUNX2 | ATAGTCCTTCCTACCCCAATTTCC | GATGAATTGGATGGTCTTGGTCC |
| OCN   | AGTTGACGGACCCCAAAGA      | GGACAGCCCAGGTCAAAGG     |

**Supplementary Table 2. Primers of ferroptosis genes for qPCR.**

| Genes   | F Sequences (5'—3')    | R Sequences (5'—3')   |
|---------|------------------------|-----------------------|
| GAPDH   | ACCCAGAAGACTGTGGATGG   | CACATTGGGGGTAGGAACAC  |
| TRIM21  | AGAGAGACTTCACCTGTTCTGT | TCAGTTCCCCTAATGCCACCT |
| CD82    | TACAAACCTCATCCAGCTCG   | TCTTCACAATGAGCTGGTTG  |
| HSF1    | GACCAAGCTGTGGACCCTC    | CACTTCCGGAAGCCATACAT  |
| PAPR9   | CGGATGTCCTGGCAGAAGAA   | ACTCGACACCTTGCGATCCAA |
| SLC40A1 | AACAAGCACCTCAGCGAGAG   | CACATCCGATCTCCCAAG    |
